# Supplementary material
Source: ML conference proceedings conference paper supplement (https://openreview.net/forum?id=5GihaaZKL4)
Supplement: supplementary_material [file attachment]

---

# Pairwise Adjusted Mutual Information

## Supplementary Material

---

Anonymous Author(s)

Affiliation

Address

email

### 1 Proof of Proposition 1

2 The first equality follows from the fact that  $X$  and  $X_\sigma$  have the same distribution. Specifically, we  
3 have for any positive integer  $k$ ,

$$P(X_\sigma = k) = P((X \circ \sigma)^{-1}(k)) = P(\sigma^{-1}(X^{-1}(k))) = P(X^{-1}(k)) = P(X = k).$$

For the second, we observe that if  $\sigma$  is a random permutation of  $\{1, \dots, n\}$ , chosen uniformly at random, so is  $\sigma^{-1}$  which implies:

$$E(H(X, Y_\sigma)) = E(H(X, Y_{\sigma^{-1}})) = E(H(X_\sigma, Y)),$$

4 where we have used the first equality and the fact that  $(X, Y_{\sigma^{-1}}) \circ \sigma = (X_\sigma, Y)$ . The third equality  
5 is a direct consequence of the two first.

### 6 Proof of Proposition 2

If  $Y$  is constant, then  $Y = Y_\sigma$  for all permutations  $\sigma$  and the result follows from (??). Now assume that  $Y$  is a permutation of  $\{1, \dots, n\}$ . Then  $H(X, Y) = H(Y) = \log(n)$  and  $I(X, Y) = H(X)$ , for any random variable  $X$ . It then follows from (??) (and the symmetry in  $X$  and  $Y$ ) that

$$\Delta I(X, Y) = I(X, Y) - E(I(X_\sigma, Y)) = 0.$$

### 7 Proof of Proposition 3

8 If  $\Delta H(X) = 0$ , then  $d((X, X_\sigma)) = 0$  for all permutation  $\sigma$ . In particular, there exists some bijection  
9  $f$  such that  $X_\sigma = f(X)$ . Now assume that for some integer  $i$ , the event  $A = \{\omega : X(\omega) = i\}$  is such  
10 that  $1 < |A| < n$ . Then there exists some  $j \neq i$  such that the event  $B = \{\omega : X(\omega) = j\}$  is not  
11 empty. Choose  $a \in A$  and  $b \in B$  and define  $\sigma$  as the permutation of  $a$  and  $b$ . Then  $X_\sigma(a) = X(b) =$   
12  $j$  while  $X_\sigma(a') = X(a') = i$  for all  $a' \in A \setminus \{a\}$ . So  $X_\sigma(a) \neq X_\sigma(a')$  while  $X(a) = X(a')$  for all  
13  $a' \in A \setminus \{a\}$ , which contradicts the existence of some mapping  $f$  that  $X_\sigma = f(X)$ . Thus for each  
14 integer  $i$ , the cardinal of the event  $A = \{\omega : X(\omega) = i\}$  is 0, 1 or  $n$ . This implies that  $X$  is constant  
15 or equal to some permutation of  $\{1, \dots, n\}$ .

### 16 Proof of Theorem 1

Consider two items selected uniformly at random in  $\{1, \dots, n\}$ . Let  $A_{i_1}, B_{j_1}$  be the clusters of the first item,  $A_{i_2}, B_{j_2}$  be the clusters of the second item. In particular, these items belong respectively to the sets  $A_{i_1} \cap B_{j_1}$  and  $A_{i_2} \cap B_{j_2}$ . The probability of this event is:

$$\frac{n_{i_1 j_1} n_{i_2 j_2}}{n^2}.$$

Now assume that these items exchange their labels for the first clustering, so that the first item move to set  $A_{i_2}$  while the second item move to the set  $A_{i_1}$ . If  $i_1 = i_2$  or  $j_1 = j_2$ , the new contingency matrix remains unchanged; now if  $i_1 \neq i_2$  and  $j_1 \neq j_2$ , the new contingency matrix  $n'_{ij}$  remains unchanged except for the following entries:

$$n'_{ij} = \begin{cases} n_{ij} - 1 & \text{for } i, j = i_1, j_1 \text{ and } i_2, j_2, \\ n_{ij} + 1 & \text{for } i, j = i_1, j_2 \text{ and } i_2, j_1. \end{cases}$$

17 We obtain the similarity between clusterings  $A$  and  $B$ :

$$\begin{aligned} s_p(A, B) = & \sum_{i_1 \neq i_2, j_1 \neq j_2} \frac{n_{i_1 j_1} n_{i_2 j_2}}{n^2} \left( \frac{n_{i_1 j_1}}{n} \log \frac{n_{i_1 j_1}}{n} - \frac{n_{i_1 j_1} - 1}{n} \log \frac{n_{i_1 j_1} - 1}{n} \right. \\ & + \frac{n_{i_2 j_2}}{n} \log \frac{n_{i_2 j_2}}{n} - \frac{n_{i_2 j_2} - 1}{n} \log \frac{n_{i_2 j_2} - 1}{n} \\ & + \frac{n_{i_1 j_2}}{n} \log \frac{n_{i_1 j_2}}{n} - \frac{n_{i_1 j_2} + 1}{n} \log \frac{n_{i_1 j_2} + 1}{n} \\ & \left. + \frac{n_{i_2 j_1}}{n} \log \frac{n_{i_2 j_1}}{n} - \frac{n_{i_2 j_1} + 1}{n} \log \frac{n_{i_2 j_1} + 1}{n} \right), \end{aligned}$$

18 where by convention,  $x \log x = 0$  for any  $x \leq 0$ . Finally,

$$\begin{aligned} s_p(A, B) = & 2 \sum_{i, j} \frac{n_{ij}(n - a_i - b_j + n_{ij})}{n^2} \left( \frac{n_{ij}}{n} \log \frac{n_{ij}}{n} - \frac{n_{ij} - 1}{n} \log \frac{n_{ij} - 1}{n} \right) \\ & + 2 \sum_{i, j} \frac{(a_i - n_{ij})(b_j - n_{ij})}{n^2} \left( \frac{n_{ij}}{n} \log \frac{n_{ij}}{n} - \frac{n_{ij} + 1}{n} \log \frac{n_{ij} + 1}{n} \right). \end{aligned}$$

## 19 Proof of Corollary 1

20 The proof follows on observing that the second sum in the expression of  $s_p(A, B)$  in Theorem 1 can  
21 be written:

$$\begin{aligned} S & \stackrel{d}{=} \sum_{i, j} \frac{(a_i - n_{ij})(b_j - n_{ij})}{n^2} \left( \frac{n_{ij}}{n} \log \frac{n_{ij}}{n} - \frac{n_{ij} + 1}{n} \log \frac{n_{ij} + 1}{n} \right) \\ & = \sum_{i, j: n_{ij} > 0} \frac{(a_i - n_{ij})(b_j - n_{ij})}{n^2} \left( \frac{n_{ij}}{n} \log \frac{n_{ij}}{n} - \frac{n_{ij} + 1}{n} \log \frac{n_{ij} + 1}{n} \right) \\ & \quad - \sum_{i, j: n_{ij} = 0} \frac{(a_i - n_{ij})(b_j - n_{ij})}{n^2} \frac{1}{n} \log \frac{1}{n}. \end{aligned}$$

22 We obtain:

$$\begin{aligned} S = & \sum_{i, j: n_{ij} > 0} \frac{(a_i - n_{ij})(b_j - n_{ij})}{n^2} \left( \frac{n_{ij}}{n} \log \frac{n_{ij}}{n} - \frac{n_{ij} + 1}{n} \log \frac{n_{ij} + 1}{n} + \frac{1}{n} \log \frac{1}{n} \right) \\ & - \left( n^2 - \sum_i a_i^2 - \sum_j b_j^2 + \sum_{i, j} n_{ij}^2 \right) \frac{1}{n} \log \frac{1}{n}. \end{aligned}$$

## 23 Proof of Corollary 2

24 The proof follows from Theorem 1 applied to the diagonal contingency matrix  $n_{ij} = a_i \delta_{ij} = b_j \delta_{ij}$ ,  
25 where  $\delta_{ij}$  denotes the Kronecker symbol.
